# Supplementary material for: Clinical decision-making for spinal manipulation for persistent spinal pain following lumbar surgery: a protocol for a systematic review and meta-analysis of individual participant data
Source: PubMed Central journal article supplement — BMJ Open. 2021 Dec 23;11(12):e054070. doi: 10.1136/bmjopen-2021-054070 (PMC8712988; doi:10.1136/bmjopen-2021-054070), 2021-12-23
Supplement: bmjopen-2021-054070supp001.pdf [file bmjopen-2021-054070supp001.pdf]

## Individual Participant Data Request Email

From: Robert.Trager@UHhospitals.org or Clinton.Daniels@VA.gov

To: [Contact author of publication]

CC: Robert Trager, Clinton Daniels, Kevin Meyer, Jeffery Dusek

Subject line: Data request for research study

Dear [Author and title],

My co-investigators (copied above) and I read your publication entitled ["\_\_\_\_\_",] published in [YYYY] with interest. We plan to reference it in our systematic review and meta-analysis of individual participant data on the topic of patients receiving spinal manipulation who have had prior lumbar spine surgery. It would greatly help us if you could provide us with additional information about the patients in your study, as this data will strengthen our ability to draw statistical inferences.

If you are able to provide us with this patient data we would be happy to acknowledge you in the publication of our results, which we plan to disseminate in a peer-reviewed journal. If you no longer have access to this data, or recommend we contact another person, please let us know or provide us with an alternative author and email to contact.

Please note that this data must be de-identified, meaning there should not be any Protected Health Information (PHI), patient names, dates of birth, treatment dates, phone numbers, or other personal identifiers. We are only seeking the information listed below for the [#] patients in your study that received spinal manipulation following lumbar surgery.

*Data collection sheet (one per patient):*

---

Patient age (Years of age at first visit if age  $\geq 18$  and  $\leq 89$ , not date of birth)

---

Patient sex

---

Description of surgery or surgeries (e.g. fusion, laminectomy, discectomy, levels involved, and presence of implant(s)/hardware)

---

Post-surgical imaging available (yes or no) (e.g. radiograph, CT, MRI, nuclear medicine)

---

Distribution of symptoms (e.g. low back, thigh, leg, foot)

---

Spinal manipulative technique(s) (e.g. thrust, non-thrust, mobilization, HVLA or non-HVLA, flexion-distraction)

---

Lumbar spine manipulation provided (yes or no)

---

Time interval from last spinal surgery to start of spinal manipulation (in months or years)

---

Thank you,

Robert Trager, DC and study team
